# Supplementary material for: On Real Structures of Real Surfaces
Source: Royal Society of Chemistry journal article supplement (doi:10.1039/d4nr00827h), 2001-01-11
Supplement: d4nr00827h1.pdf [file d4nr00827h1.pdf]

# Supporting Information

## **Heterointerface MnO<sub>2</sub>/RuO<sub>2</sub> with rich oxygen vacancies for enhanced oxygen evolution in acidic media**

Zhiming Guan, Qian Chen, Lin Liu, Chenghui Xia\*<sup>a</sup>, Lixin Cao\*<sup>a</sup>, Bohua Dong\*<sup>a</sup>

<sup>a</sup>School of Materials Science and Engineering, Ocean University of China, No. 1299, Sansha Road, Huangdao District, Qingdao, 266000, People's Republic of China.

\*Corresponding Author

Bohua Dong, E-mail: [dongbohua@ouc.edu.cn](mailto:dongbohua@ouc.edu.cn)

Lixin Cao, E-mail: [caolixin@ouc.edu.cn](mailto:caolixin@ouc.edu.cn)

Chenghui Xia, E-mail: [c.xia@ouc.edu.cn](mailto:c.xia@ouc.edu.cn)

### **This PDF file includes:**

Supporting Information Text

Figures S1 to S14

Tables S1 to S4

SI References

## Supporting Information Text

### 1. Experimental Section

#### 1.1 Materials

Manganese (II) chloride ( $\text{MnCl}_2$ , >99 %), Ammonium bicarbonate ( $\text{NH}_4\text{HCO}_3$ , >99.5 %), Potassium permanganate ( $\text{KMnO}_4$ , >98 %), Ruthenium (III) chloride hydrate ( $\text{RuCl}_3 \cdot x\text{H}_2\text{O}$ , 35.0-42.0 %), Hydrochloric acid ( $\text{HCl}$ , 37 %) and Sulfuric acid ( $\text{H}_2\text{SO}_4$ , 97 %) were purchased from Aladdin. Deionized water (resistivity >18  $\text{M}\Omega \cdot \text{cm}$ ) used throughout the experiment was purified by the GWA-UN1-F20 system (Beijing Purkinje General Instrument Co., Ltd). Ethanol was purchased from Beijing Tongguang Fine Chemicals Co., Ltd. Carbon cloth (CC) was purchased from Shanghai Hesen Electric Co., Ltd. Alfa Aesar supplied Nafion solution (5 wt.%). All chemicals were used without further purification.

#### 1.2 Synthesis of $\text{MnO}_2/\text{RuO}_2$

Dissolve 1 mmol of  $\text{MnCl}_2$  in 50 ml of deionized water and stir thoroughly. Dissolve 10 mmol of  $\text{NH}_4\text{HCO}_3$  in a mixture of 55 ml of anhydrous ethanol and deionized water ( $V_{\text{water}}: V_{\text{ethanol}} = 10:1$ ) and stir the mixture well. After combining the two solutions and stirring at 60 °C in a water bath, the colorless solution will turn milky white, indicating the formation of  $\text{MnCO}_3$ . Once the reaction is complete, collect the white precipitate by centrifugation and wash it multiple times with deionized water. Mix the obtained white precipitate of  $\text{MnCO}_3$  with 40 ml of deionized water and stir thoroughly. Add 5 ml of the  $0.03 \text{ mol} \cdot \text{L}^{-1}$   $\text{KMnO}_4$  solution and stir for 0.5 h. Then add 5 ml of a  $5 \text{ mol} \cdot \text{L}^{-1}$  hydrochloric acid solution and stir for an additional 0.5 h. Collect the brown precipitate by centrifugation and wash it multiple times with deionized water. Mix the precipitate with 60 ml of deionized water and stir evenly. Add X mmol of  $\text{RuCl}_3 \cdot x\text{H}_2\text{O}$  and stir vigorously for 6h. Collect the black precipitate by centrifugation and wash it multiple times with deionized water. Dry the precipitate in a vacuum oven at 60 °C overnight to obtain a powdery product. The resulting powdery product is first sintered in  $\text{N}_2$  at 350 °C for 2 h, then sintered in air at 350 °C for an additional 2 h. The product obtained is named  $\text{MnO}_2/\text{XRuO}_2$ , ( $X = 0.10, 0.15, 0.20$ ),  $\text{MnO}_2/0.15\text{RuO}_2$  is abbreviated as  $\text{MnO}_2/\text{RuO}_2$ . For samples with different Ru contents, the synthesis process remains the same in all steps except for the Ru addition. For samples with 0.1 mmol of  $\text{RuCl}_3 \cdot x\text{H}_2\text{O}$ , 0.15 mmol of  $\text{RuCl}_3 \cdot x\text{H}_2\text{O}$  and 0.2 mmol of  $\text{RuCl}_3 \cdot x\text{H}_2\text{O}$ , respectively. Samples without the addition of  $\text{RuCl}_3 \cdot x\text{H}_2\text{O}$  are named  $\text{MnO}_2$ .

#### 1.3 Electrode preparation

5.0 mg of catalyst was dispersed in a mixture of 740  $\mu\text{l}$  of anhydrous ethanol, 240  $\mu\text{l}$  of deionized water, and 20  $\mu\text{l}$  of Nafion (5 wt.%), and ultrasonically dispersed for 1 h to obtain a homogeneously dispersed ink, and then 200  $\mu\text{l}$  of ink was drop-coated onto a  $1 \times 1 \text{ cm}^2$  carbon cloth (CC) with a catalyst loading of  $1 \text{ mg}\cdot\text{cm}^{-2}$ . After drying at room temperature, the electrochemical tests can be performed.

## 2. Electrochemical measurements of the OER

All electrochemical tests were obtained using a CHI760E electrochemical workstation (ChenHua Instruments, Shanghai, China) with a standard three-electrode system at room temperature. The working electrode (working area of  $1 \times 1 \text{ cm}^2$ ) was a carbon cloth loaded with catalyst, and carbon rods and Ag/AgCl (saturated KCl) were used as counter electrodes and reference electrodes, respectively. A commercial  $\text{RuO}_2$  ( $\text{RuO}_2$ ) catalyst with the same loading amount was used as the reference catalyst. Prior to testing, the electrocatalyst was subjected to cyclic voltammetry (CV) activation of the electrodes in the voltage range of 1.0-1.4 V vs. Ag/AgCl until a stable CV curve was obtained before testing. Linear scanning voltammetry (LSV) was performed at a scan rate of  $5 \text{ mV}\cdot\text{s}^{-1}$ . Electrochemical impedance spectroscopy (EIS) measurements were performed in a 0.5 M  $\text{H}_2\text{SO}_4$  solution at an open-circuit voltage vs. RHE in the frequency range of 10 kHz to 0.1 Hz. The results were presented in the form of Nyquist plots and fitted to representative equivalent circuits using the ZView software. The electrochemical double layer capacitance ( $C_{dl}$ ) was calculated by analyzing the CV curves at different scan rates of 10, 20, 40, 60, 80, and 100  $\text{mV}\cdot\text{s}^{-1}$ . A total of 10000 CV cycles and chronopotential tests were performed to evaluate the durability of the electrochemical catalysts. All potentials measured in a 0.5 M  $\text{H}_2\text{SO}_4$  electrolyte were converted to reversible hydrogen electrodes (RHE) via the Nernst equation (1):

$$E_{\text{RHR}} = E_{\text{Ag/AgCl}} + 0.0591 \times \text{pH} + 0.197 \quad (1)$$

Due to the resistance between the catalyst and electrolyte interface, the polarization curves were corrected for 90% compensation based on the  $iR$  in the electrolyte. The Tafel slope is calculated from the Tafel equation (2):

$$\eta = b \times \log j + a \quad (2)$$

where  $\eta$  is the overpotential,  $b$  is the Tafel slope,  $j$  is the current density, and  $a$  is a constant.

### 2.1 Calculation of the mass activity

The mass activity ( $j \text{ A}\cdot\text{g}^{-1}_{\text{Ru}}$ ) of  $\text{MnO}_2/\text{RuO}_2$  and  $\text{RuO}_2$  catalysts was determined using equation (3):

$$j \text{ (A} \cdot \text{g}_{\text{Ru}}^{-1}) = \frac{j_{\text{geo}} \times A_{\text{geo}}}{m_{\text{Ru}}} \quad (3)$$

where  $m_{\text{Ru}}$  is the mass of Ru loaded on the carbon cloth calculated from the ICP-OES analysis,  $A_{\text{geo}}$  is the geometric area, and  $j_{\text{geo}}$  is the geometric current density.

## 2.2 Calculation of TOF

The TOF of  $\text{MnO}_2/\text{RuO}_2$  and  $\text{RuO}_2$  catalysts was determined using equation (4):

$$\begin{aligned} \text{TOF (O}_2 \text{ h}^{-1}) &= 3600 \times \text{TOF (O}_2 \text{ s}^{-1}) \\ &= 3600 \times \frac{\text{O}_2 \text{ turnovers per } A_{\text{geo}}}{\text{Active sites per } A_{\text{geo}}} \end{aligned} \quad (4)$$

From the geometric current density of the LSV polarization curve, the  $\text{O}_2$  conversion rate per geometric area can be derived. is derived from the geometric current density of the LSV polarization curve according to equation (5):

$$\begin{aligned} &\text{O}_2 \text{ turnovers per } A_{\text{geo}} \\ &= j_{\text{geo}} \times \frac{1\text{C} \cdot \text{s}^{-1}}{1000\text{mA}} \times \frac{1\text{mol}}{96485.3\text{C}} \times \frac{1}{4} \times \frac{6.023 \times 10^{23}}{1 \text{ mol O}_2} \end{aligned} \quad (5)$$

It is assumed that all the Ru atoms in the catalyst are active sites. Therefore, the number of active sites per geometrical area is equal to the number of Ru atoms per geometrical area, which can be calculated from the results of the ICP-OES analysis.

## 2.3 Characterizations

X-ray diffraction (XRD) tests were conducted using a Bruker D8 Advance X-ray diffractometer equipped with a copper target and a scanning speed of  $5^\circ/\text{min}$ . Scanning electron microscopy (SEM) measurements were carried out on a Gemini300 field scanning electron microscope operating at an accelerating voltage of 5 kV. High-resolution transmission electron microscopy (HRTEM) images were obtained using a JEOL JEM-F200 instrument with an accelerating voltage of 200 kV, coupled with the JED-2300T spectroscopy model. The X-ray photoelectron spectroscopy (XPS) spectra of the samples were acquired using a Thermo Scientific K-Alpha photoelectron spectrometer. The obtained XPS spectra were charge-corrected and adjusted using a C 1s line at 284.8 eV, followed by curve fitting analysis. Electron paramagnetic resonance spectroscopy (EPR) was obtained by testing on a Bruker EMX PLUS, Germany. Inductively Coupled Plasma Optical Emission Spectroscopy (ICP-OES) analysis was performed on an Agilent 5110 instrument.

## Supporting Figures

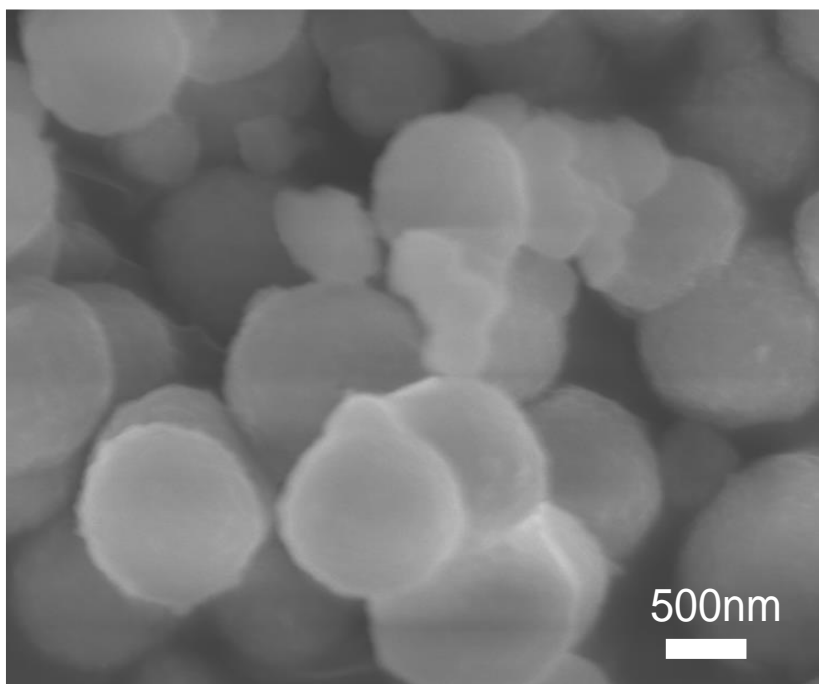

**Fig. S1.** SEM image of MnCO<sub>3</sub>.

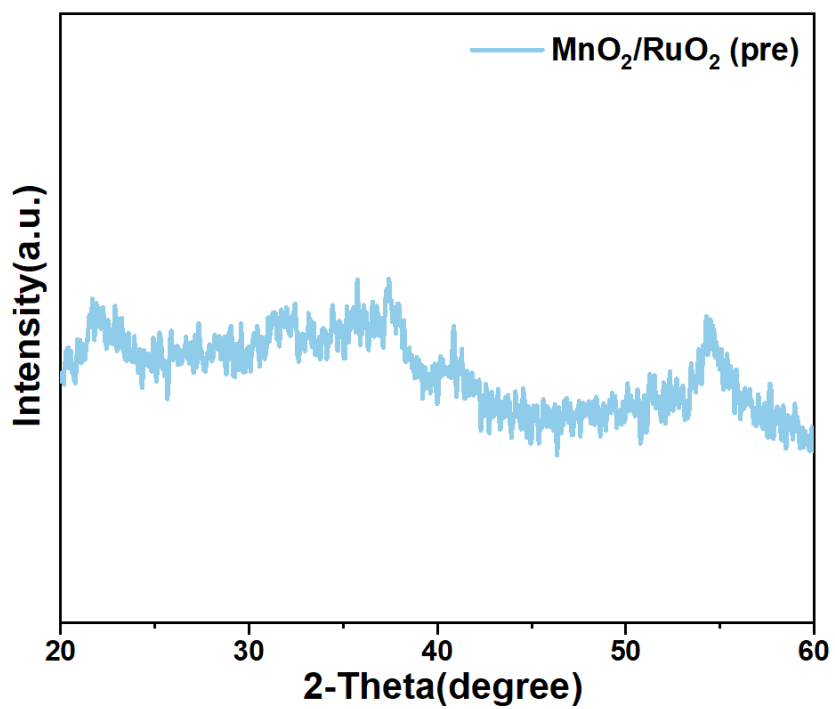

Fig. S2. XRD pattern of precursor MnO<sub>2</sub>/RuO<sub>2</sub>(pre).

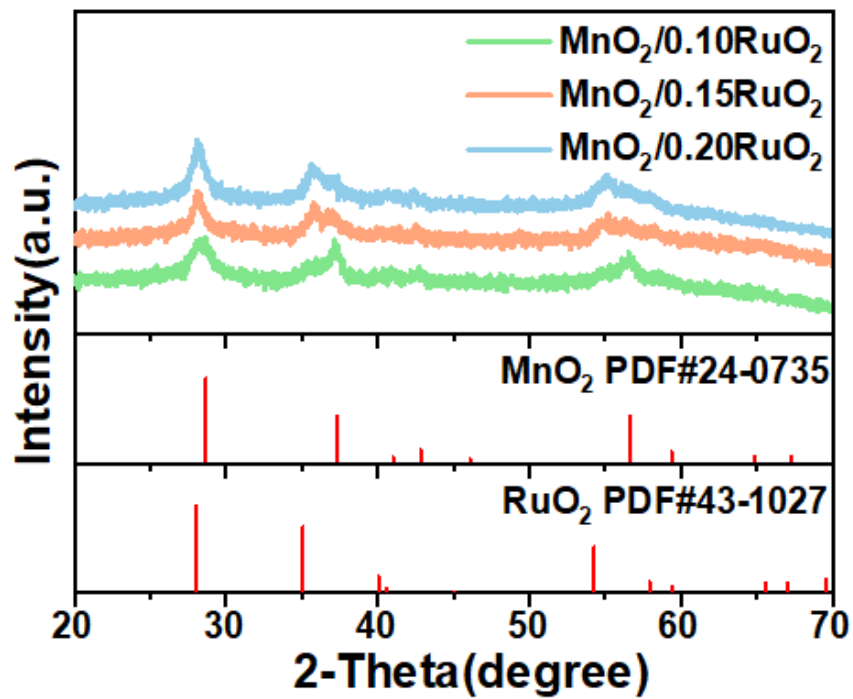

Fig. S3. XRD patterns of  $\text{MnO}_2/0.10\text{RuO}_2$ ,  $\text{MnO}_2/0.15\text{RuO}_2$  and  $\text{MnO}_2/0.20\text{RuO}_2$ .

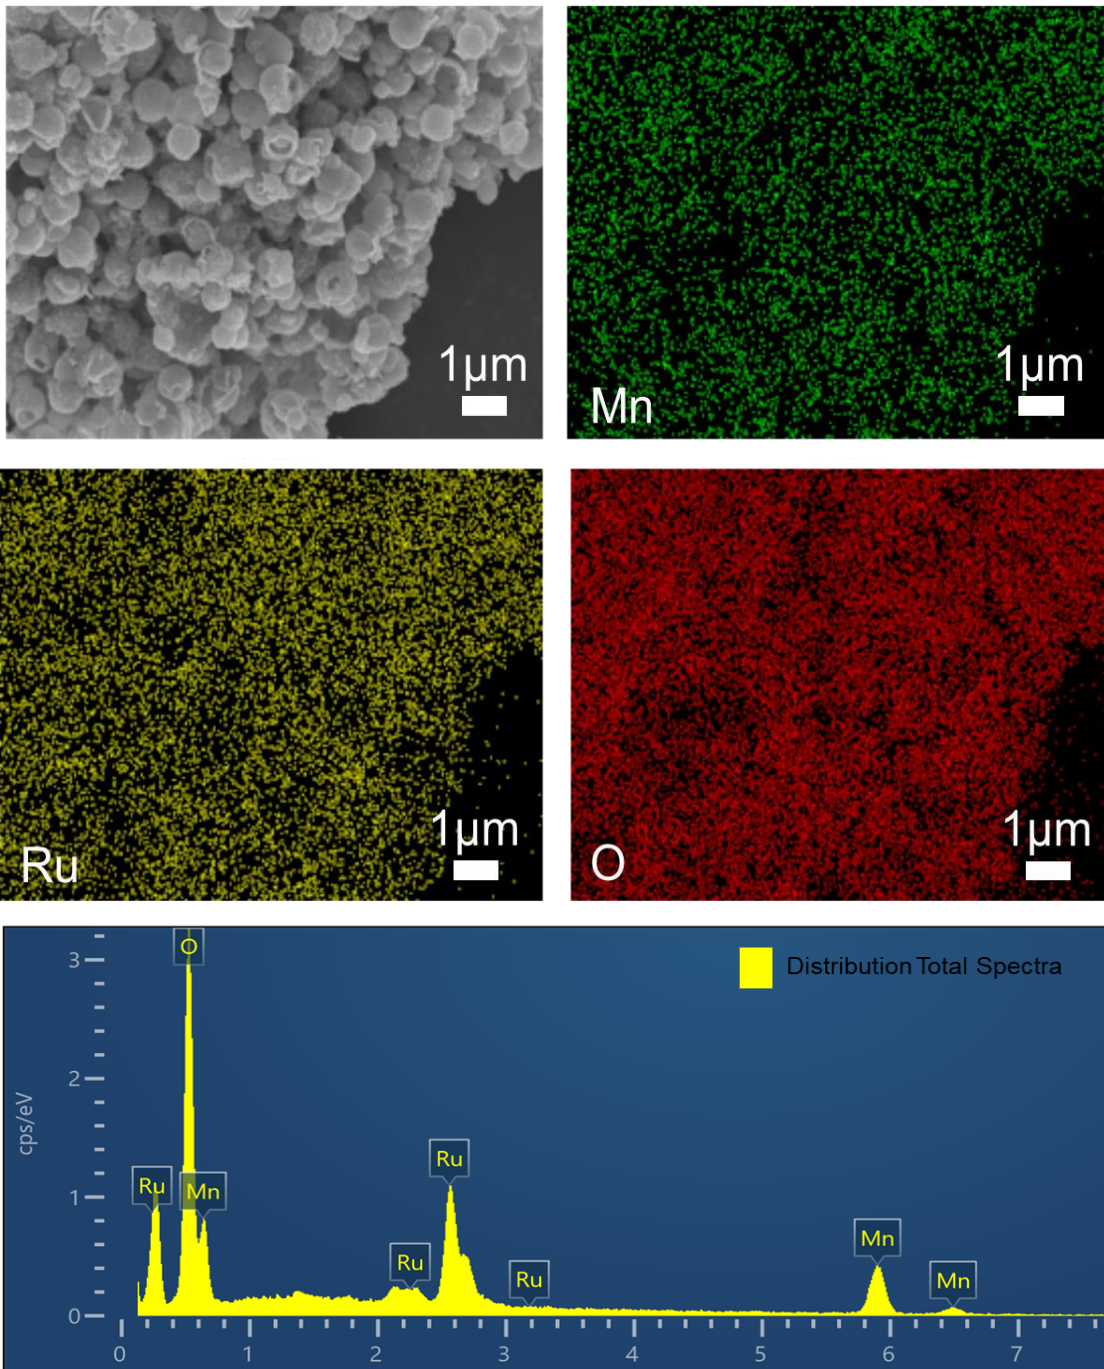

**Fig. S4.** EDX elemental mapping images of MnO<sub>2</sub>/RuO<sub>2</sub>, including the Mn, Ru, and O elements.



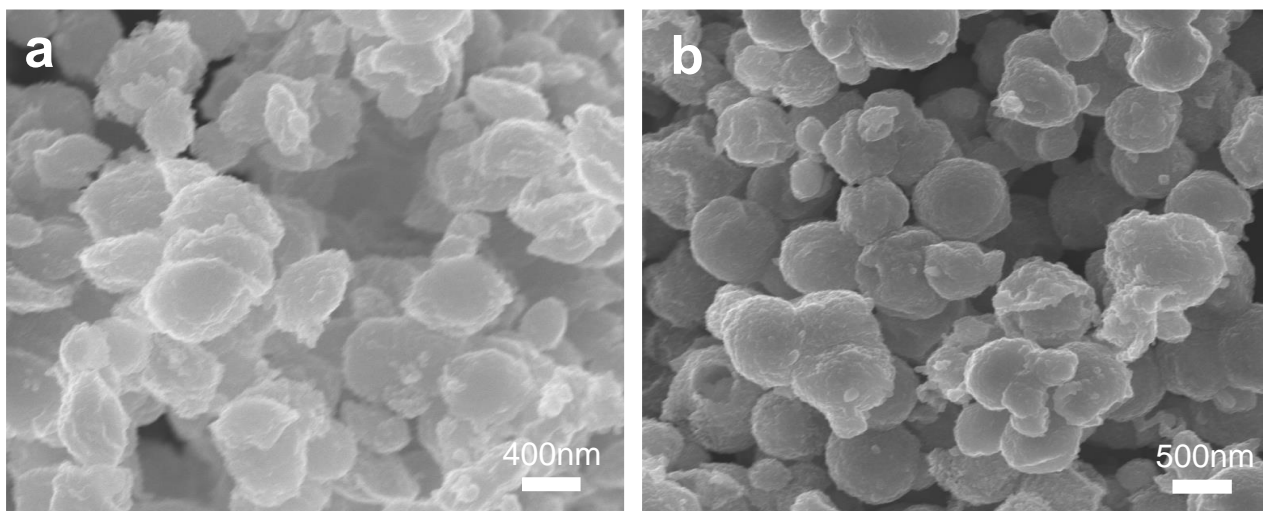

**Fig. S5.** SEM image of  $\text{MnO}_2/0.10\text{RuO}_2$  (a) and  $\text{MnO}_2/0.20\text{RuO}_2$  (b).

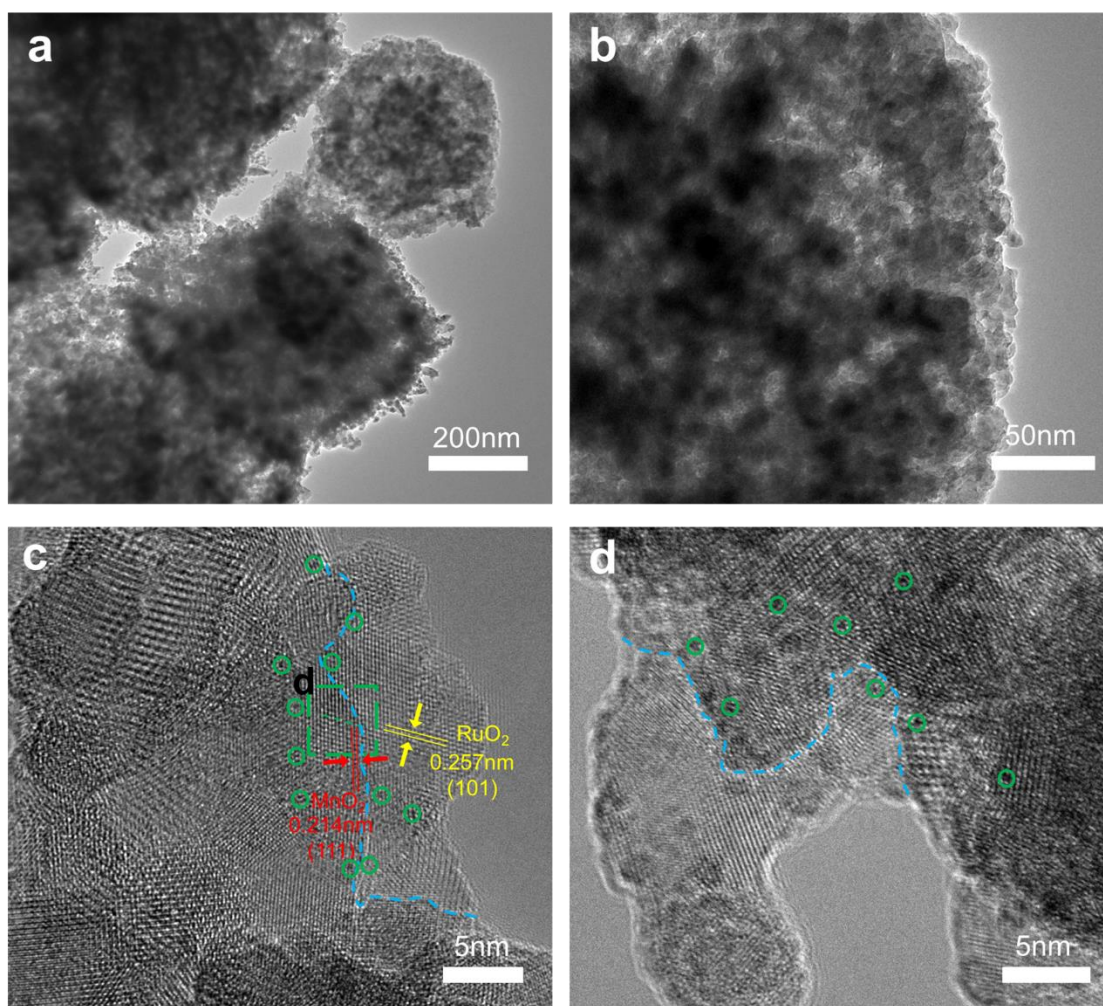

**Fig. S6.** (a-d) HRTEM image of MnO<sub>2</sub>/RuO<sub>2</sub>.

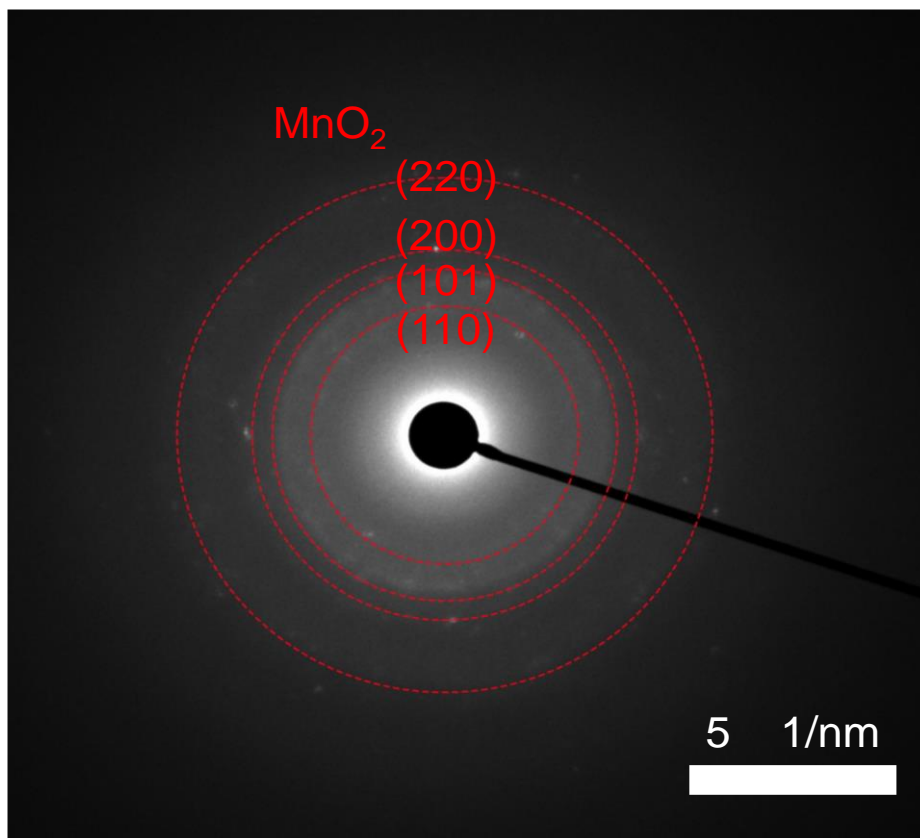

**Fig. S7.** The corresponding selected area electron diffraction for MnO<sub>2</sub>/RuO<sub>2</sub>.

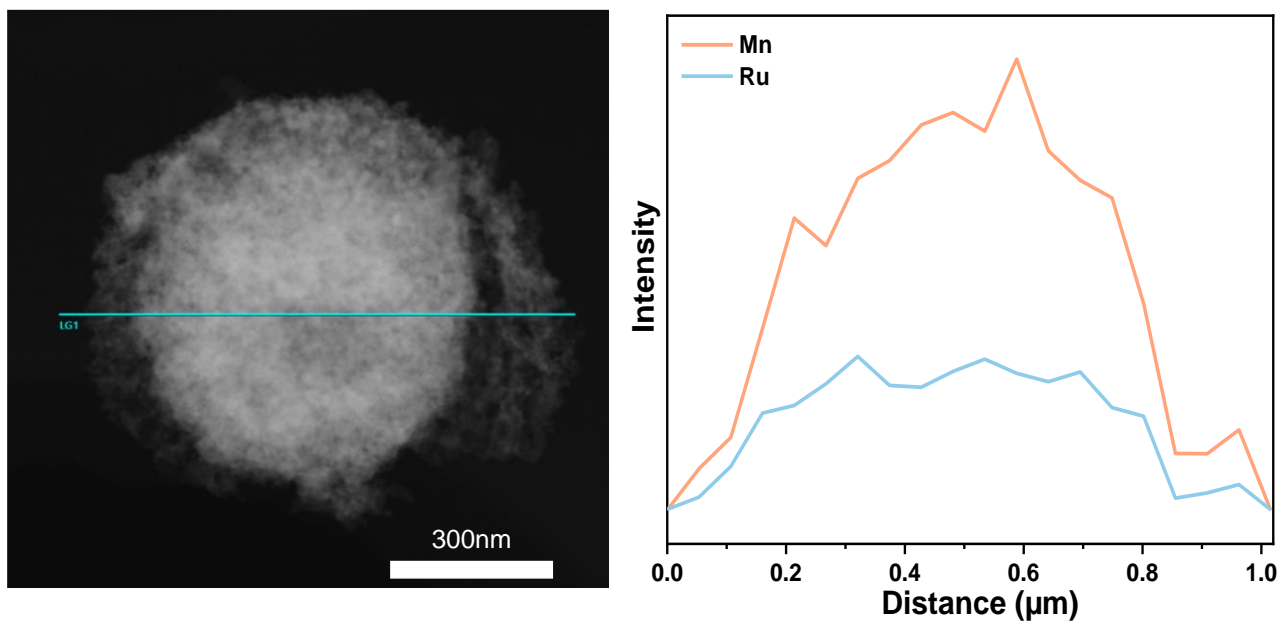

**Fig. S8.** EDS line-scan profile along the grey line in the HRTEM image and corresponding simulation curves.

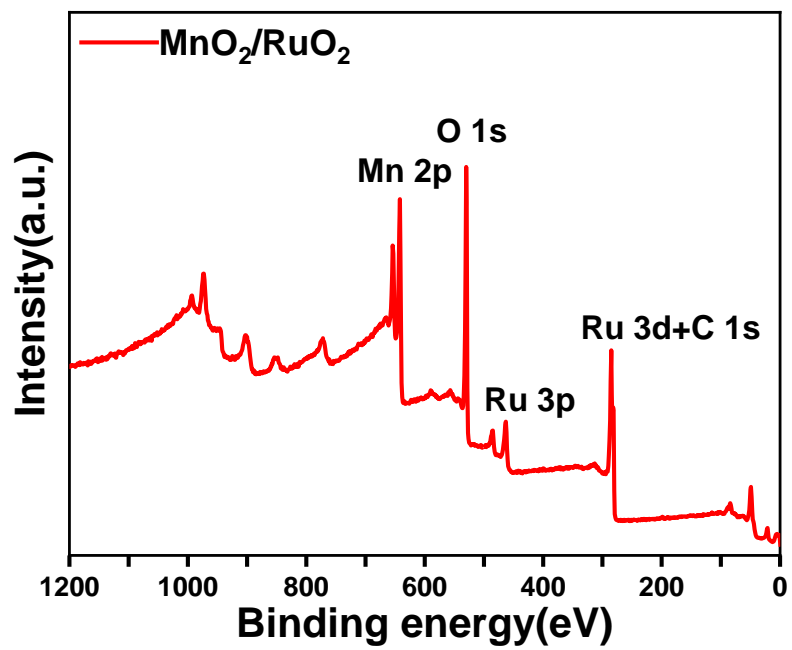

Fig. S9. XPS survey spectrum of MnO<sub>2</sub>/RuO<sub>2</sub>.

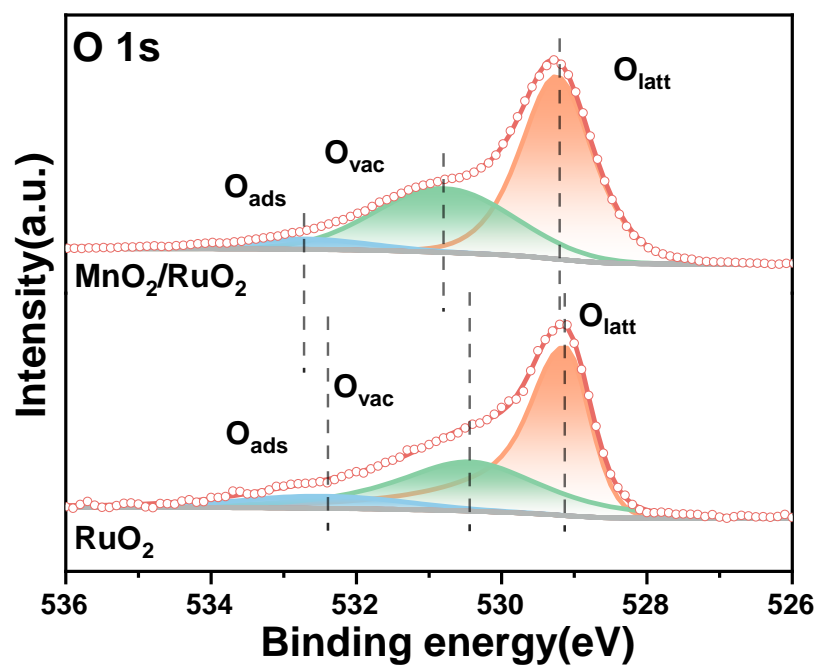

**Fig. S10.** High-resolution XPS spectra of O 1s for MnO<sub>2</sub>/RuO<sub>2</sub> and RuO<sub>2</sub>.

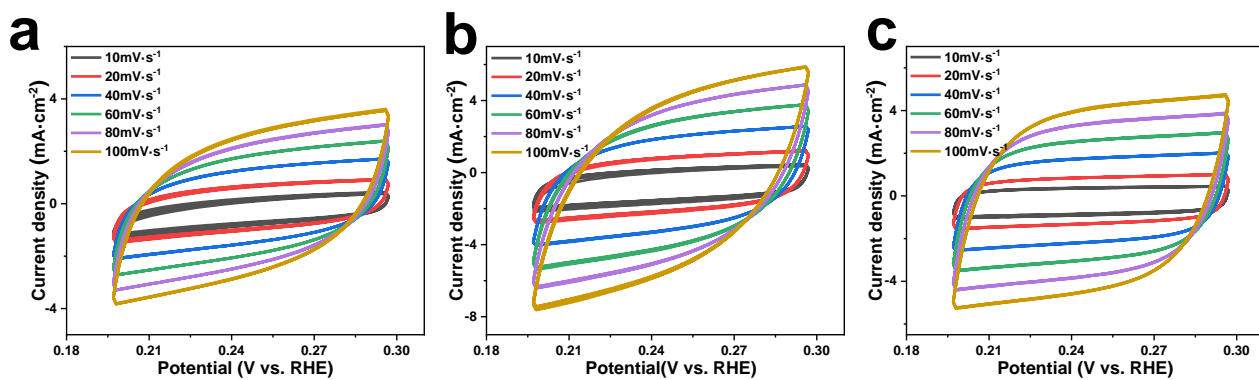

**Fig. S11.** The CV curves of  $\text{MnO}_2/0.10\text{RuO}_2$  (a),  $\text{MnO}_2/0.15\text{RuO}_2$  (b) and  $\text{MnO}_2/0.20\text{RuO}_2$  (c) with the scan rate ranging from 10 to  $100 \text{ mV}\cdot\text{s}^{-1}$  in  $0.5 \text{ M H}_2\text{SO}_4$ , the  $C_{dl}$  values at the potential of  $0.247 \text{ V}$ .

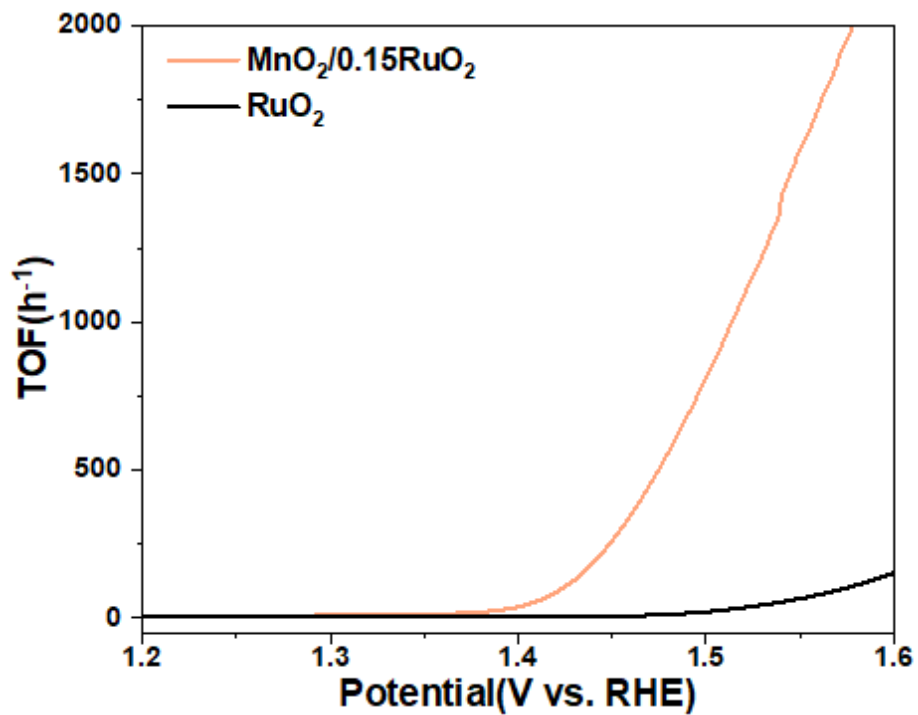

Fig. S12. TOF of MnO<sub>2</sub>/RuO<sub>2</sub> and RuO<sub>2</sub> electrode.



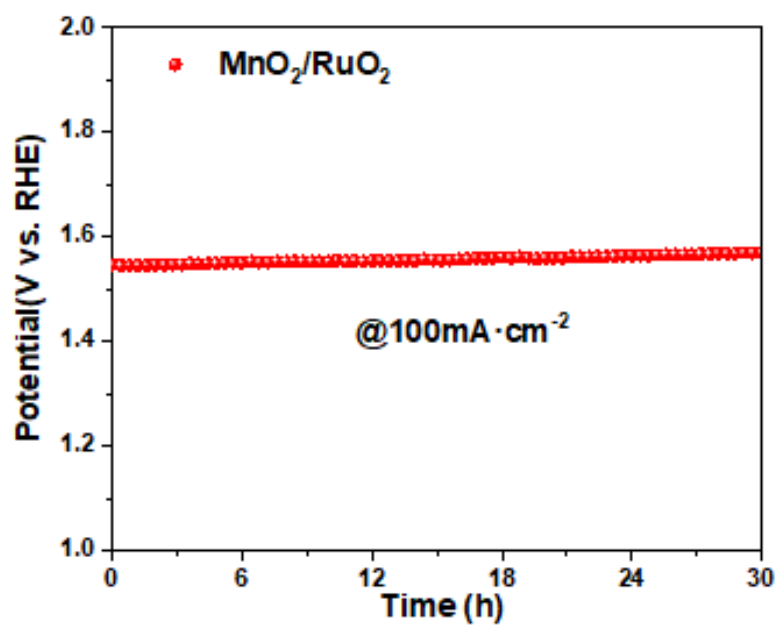

**Fig. S13.** Chronopotentiometry measurement without iR compensation at the OER current density of  $100 \text{ mA} \cdot \text{cm}^{-2}$  for  $\text{MnO}_2/\text{RuO}_2$  electrode.

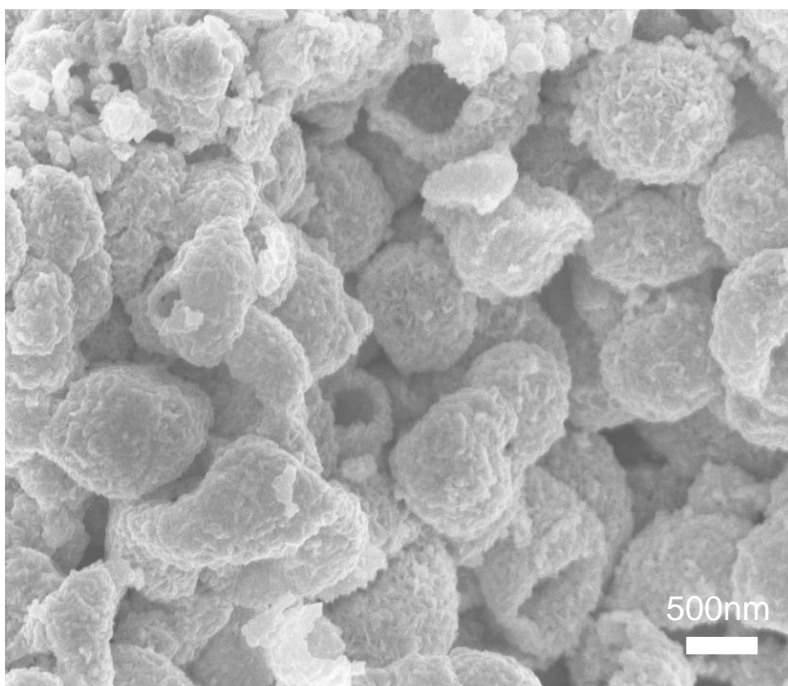

**Fig. S14.** (a) SEM image of  $\text{MnO}_2/\text{RuO}_2$  sample after stability test.

## Supporting Tables

**Table S1.** The molar percent of Mn and Ru species for MnO<sub>2</sub>/RuO<sub>2</sub> measured by ICP-OES analysis.

| Sample                             | Test element | Sample Elemental Content |           |
|------------------------------------|--------------|--------------------------|-----------|
|                                    |              | W(%)                     | Atomic(%) |
| MnO <sub>2</sub> /RuO <sub>2</sub> | Mn           | 51.51%                   | 85.27%    |
|                                    | Ru           | 16.37%                   | 14.73%    |
|                                    | O            | 32.12%                   | /         |

**Table S2.** Percentage of  $O_{\text{latt}}$ ,  $O_{\text{vac}}$  and  $O_{\text{ads}}$  in XPS of O 1s for  $\text{MnO}_2/\text{RuO}_2$ ,  $\text{MnO}_2$  and  $\text{RuO}_2$ .

| <b>Sample</b>                                 | <b><math>O_{\text{latt}}</math></b> | <b><math>O_{\text{vac}}</math></b> | <b><math>O_{\text{ads}}</math></b> |
|-----------------------------------------------|-------------------------------------|------------------------------------|------------------------------------|
| <b><math>\text{MnO}_2/\text{RuO}_2</math></b> | 56.82%                              | 34.66%                             | 8.52%                              |
| <b><math>\text{MnO}_2</math></b>              | 70.42%                              | 15.49%                             | 14.09%                             |
| <b><math>\text{RuO}_2</math></b>              | 68.14%                              | 23.72%                             | 8.14%                              |

**Table S3.** Comparison of the OER performance of MnO<sub>2</sub>/RuO<sub>2</sub> in acid with some representative Ru-containing OER electrocatalysts.

| Catalyst                                                              | Overpotential@<br>10 mA·cm <sup>-2</sup> (mV) | Tafel<br>(mV·dec <sup>-1</sup> ) | Stability                        | Ref.      |
|-----------------------------------------------------------------------|-----------------------------------------------|----------------------------------|----------------------------------|-----------|
| MnO <sub>2</sub> /RuO <sub>2</sub>                                    | 181                                           | 55.4                             | 140h @ 10<br>mA·cm <sup>-2</sup> | This work |
| IrO <sub>2</sub> -RuO <sub>2</sub> @Ru                                | 281                                           | 53.1                             | 20h @ 1.5V                       | 1         |
| RuO <sub>2</sub> nanosheets                                           | 255                                           | 38.0                             | 3h @ 10 mA·cm <sup>-2</sup>      | 2         |
| Mn <sub>0.73</sub> Ru <sub>0.27</sub> O <sub>2-δ</sub>                | 208                                           | 65.3                             | 10h @ 10<br>mA·cm <sup>-2</sup>  | 3         |
| RuIrO <sub>2</sub>                                                    | 233                                           | 42.0                             | 24h @ 1.45V                      | 4         |
| RuCu nanoalloy                                                        | 270                                           | 75.8                             | 20h @ 10<br>mA·cm <sup>-2</sup>  | 5         |
| Y <sub>1.85</sub> Zn <sub>0.15</sub> Ru <sub>2</sub> O <sub>7-δ</sub> | 290                                           | 36.9                             | 10h @ 1.5V                       | 6         |
| Ru@Ir-O                                                               | 238                                           | 91.3                             | 40h @ 10<br>mA·cm <sup>-2</sup>  | 7         |

---

|                                                       |     |      |                                  |    |
|-------------------------------------------------------|-----|------|----------------------------------|----|
| Ru <sub>1</sub> Ir <sub>1</sub> O <sub>x</sub>        | 204 | 71.3 | 100h @ 10<br>mA·cm <sup>-2</sup> | 8  |
| Ru@FLC                                                | 258 | 53.1 | 24h @ 1.49V                      | 9  |
| E-Ru/Fe NAs                                           | 238 | 44.8 | 9h @ 5 mA·cm <sup>-2</sup>       | 10 |
| Ru-N-C                                                | 267 | 52.6 | 30h @ 10<br>mA·cm <sup>-2</sup>  | 11 |
| IrRu@Te                                               | 220 | 35.0 | 20h @ 10<br>mA·cm <sup>-2</sup>  | 12 |
| Si-RuO <sub>x</sub> @C                                | 220 | 53.0 | 100h @ 10<br>mA·cm <sup>-2</sup> | 13 |
| RuO <sub>2</sub> /(Co,Mn) <sub>3</sub> O <sub>4</sub> | 270 | 77.0 | 24h @ 10<br>mA·cm <sup>-2</sup>  | 14 |

---

**Electrolyte is 0.5M H<sub>2</sub>SO<sub>4</sub>.**

**Table S4.** ICP-OES results of dissolved Mn and Ru mass percent in the electrolyte of MnO<sub>2</sub>/RuO<sub>2</sub> and RuO<sub>2</sub> after 1000 CVs tests.

| <b>Sample</b>                          | <b>Sample amount</b> | <b>Concentrations of Ru ion<br/>(<math>\mu\text{g mL}^{-1}</math>)/Mn ion (<math>\mu\text{g mL}^{-1}</math>)</b> | <b>Loss mass<br/>percent of<br/>Ru/Mn</b> |
|----------------------------------------|----------------------|------------------------------------------------------------------------------------------------------------------|-------------------------------------------|
| <b>MnO<sub>2</sub>/RuO<sub>2</sub></b> | 1mg<br>(0.16mg Ru)   | 0.027/0.333                                                                                                      | 0.85%/3.23%                               |
| <b>RuO<sub>2</sub></b>                 | 1mg<br>(0.76mg Ru)   | 0.42/0                                                                                                           | 2.75%/0                                   |

## SI References

1. G. Li, S. Li, J. Ge, C. Liu and W. Xing, *J. Mater. Chem. A*, 2017, **5**, 17221-17229.
2. S. Laha, Y. Lee, F. Podjaski, D. Weber, V. Duppel, L. M. Schoop, F. Pielnhofer, C. Scheurer, K. Müller, U. Starke, K. Reuter and B. V. Lotsch, *Adv. Energy Mater.*, 2019, **9**, 1803795-1803802.
3. K. Wang, Y. Wang, B. Yang, Z. Li, X. Qin, Q. Zhang, L. Lei, M. Qiu, G. Wu and Y. Hou, *Energy Environ. Sci.*, 2022, **15**, 2356-2365.
4. Z. Zhuang, Y. Wang, C. Q. Xu, S. Liu, C. Chen, Q. Peng, Z. Zhuang, H. Xiao, Y. Pan, S. Lu, R. Yu, W. C. Cheong, X. Cao, K. Wu, K. Sun, Y. Wang, D. Wang, J. Li and Y. Li, *Nat. Commun.*, 2019, **10**, 4875-4884.
5. Y. Li, W. Zhou, X. Zhao, W. Cheng, H. Su, H. Zhang, M. Liu and Q. Liu, *ACS Appl. Energy Mater.*, 2019, **2**, 7483-7489.
6. Q. Feng, Q. Wang, Z. Zhang, Y. Xiong, H. Li, Y. Yao, X.-Z. Yuan, M. C. Williams, M. Gu, H. Chen, H. Li and H. Wang, *Appl. Catal. B*, 2019, **244**, 494-501.
7. J. Zhang, X. Fu, F. Xia, W. Zhang, D. Ma, Y. Zhou, H. Peng, J. Wu, X. Gong, D. Wang and Q. Yue, *Small*, 2022, **18**, 2108031-2108038.
8. J. He, X. Zhou, P. Xu and J. Sun, *Adv. Energy Mater.*, 2021, **11**, 2102883-2102891.
9. C. Shi, Y. Yuan, Q. Shen, X. Yang, B. Cao, B. Xu, B. Kang, Y. Sun and C. Li, *J. Colloid Interface Sci.*, 2022, **612**, 488-495.
10. Q. Yao, B. Huang, Y. Xu, L. Li, Q. Shao and X. Huang, *Nano Energy*, 2021, **84**, 105909-105916.
11. L. Cao, Q. Luo, J. Chen, L. Wang, Y. Lin, H. Wang, X. Liu, X. Shen, W. Zhang, W. Liu, Z. Qi, Z. Jiang, J. Yang and T. Yao, *Nat. Commun.*, 2019, **10**, 4849-4857.
12. J. Xu, Z. Lian, B. Wei, Y. Li, O. Bondarchuk, N. Zhang, Z. Yu, A. Araujo, I. Amorim, Z. Wang, B. Li and L. Liu, *ACS Catal.*, 2020, **10**, 3571-3579.
13. C. Liu, Y. Jiang, T. Wang, Q. Li and Y. Liu, *Adv. Sci.*, 2023, **10**, 2207429-2207435.
14. S. Niu, X.-P. Kong, S. Li, Y. Zhang, J. Wu, W. Zhao and P. Xu, *Appl. Catal. B*, 2021, **297**, 120442-120449.
